# 1 **Synthesising the multiple impacts of climatic variability on** 2 **community responses to climate change**

## 3 Authors

4 J. Christopher D. Terry\*<sup>1</sup> 0000-0002-0626-9938

5 Jacob D. O’Sullivan<sup>1</sup> 0000-0003-2386-6635

6 Axel G. Rossberg<sup>1</sup> 0000-0001-9014-3176

7 1: School of Biological and Chemical Sciences, Queen Mary University of London, London, UK

8 \* Corresponding Author – [c.terry@qmul.ac.uk](mailto:c.terry@qmul.ac.uk)

## 9 Abstract

10 Recent developments in understanding and predicting species responses to climate change have  
11 emphasised the importance of both environmental variability and consideration of the wider biotic  
12 community. To date, the interaction between the two has received less attention. However,  
13 considerable bodies of theory and empirical results suggest that multi-species consequences of  
14 variability can have strong impacts on range limits and the speed of range shifts. Here we  
15 demonstrate how biotic interactions and temporal variability can act together to influence range  
16 shift dynamics and highlight the need to understand these interactions in order to predict how  
17 species will respond to global change. We emphasise the value and utility of partitioning approaches  
18 applied to parameterised models to determine the direction and relative importance and direct of  
19 these forces in empirical systems.

## 20 Authorship

21 JCDT wrote the manuscript and built the models. All authors contributed significantly to the editing  
22 and manuscript development.

## 23 Funding

24 The work was supported by NERC grant NE/T003510/1

25 Data Sharing and Data Accessibility

26 Code to generate all results is publicly available at [https://github.com/jcdterry/ClimateVar\\_BioticInts](https://github.com/jcdterry/ClimateVar_BioticInts)

27 and should the manuscript be accepted will be permanently archived. The paper contains no new

28 datasets.

29 Running title

30 *Temporal variability and community responses*

31 Keywords

32 Range shifts, temporal variation, community responses, coexistence theory, climate change

## 33 Introduction

34 Climate change is forcing species across the world to either adapt to different environments in-situ  
35 or shift their range to track moving climates. A signal of climate-change induced spatial displacement  
36 is clearly visible in shifts in the observed distribution of species across the globe (Parmesan & Yohe  
37 2003; Lenoir *et al.* 2020). Improving our understanding of how range shifts will progress is critical to  
38 future conservation efforts and ecosystem management (Pecl *et al.* 2017). Here we argue that  
39 multiple strands of ecological theory regarding the direct and indirect impacts of climate variability  
40 in determining community-level responses can be informative to this wider effort.

41 Long-term climatic trends are accompanied by higher-frequency variation. This is partly cyclical  
42 (seasonal and diurnal) but there is also a considerable stochastic element. Differences in mean  
43 temperature between years are often comparable to decades of mean climate change (Huntingford  
44 *et al.* 2013). It is well established that environmental variability can have far-reaching impacts on  
45 populations (Coulson *et al.* 2004; Lawson *et al.* 2015; Boettiger 2018; Shoemaker *et al.* 2020b). On  
46 top of this, interactions with other species strongly influence a species' range (Sexton *et al.* 2009;  
47 Kraft *et al.* 2015; Sirén & Morelli 2020). As much as climate driven range shifts are fundamentally  
48 driven by the dependence of demographic rates on climatic variables, it is well recognised that the  
49 response of an individual species to climatic change cannot be understood in isolation from the rest  
50 of the community (Svenning *et al.* 2014; Davis *et al.* 1998; Araújo & Luoto 2007; Gilman *et al.* 2010;  
51 Urban *et al.* 2012, 2016; Ettinger & HilleRisLambers 2017; O'Brien *et al.* 2017; Legault *et al.* 2020).  
52 Rather than environment and competition acting as independent determinants of range limits, their  
53 combined effect is critical (Germain *et al.* 2018).

54 To date, the direct, systematic analysis of the effect of variability on extinction risk has been  
55 dominated by single-species studies (Bennie *et al.* 2013; Renton *et al.* 2014; Vasseur *et al.* 2014;  
56 Lawson *et al.* 2015; Bernhardt *et al.* 2018). Likewise, the majority of existing approaches to  
57 modelling the impact of climate change on multi-species distributions assume a smooth increase in

58 the driving climate variable (Urban *et al.* 2012; Thompson & Gonzalez 2017, Alexander *et al.* 2018).  
59 However, temporal variability influences species dynamics, and hence response to climate change  
60 through multiple direct and indirect routes (Fig 1.)

61 We propose here that the current discussion around ecological responses to climate change could  
62 be missing a key element – the role of temporal variability in determining how interspecific  
63 interactions play out (Vasseur & Fox 2009; Gudmundson *et al.* 2015; Fey & Vasseur 2016; Dee *et al.*  
64 2020). Two related questions emerge: firstly, how does considering variability change our  
65 expectations for how communities will respond to shifts in mean conditions? And secondly, since  
66 increasing interannual variability in vegetation productivity is already detectable in satellite  
67 observations (Chen *et al.* 2019) and expected in a number of other environments (Swain *et al.* 2018),  
68 what impact would changes in variability patterns have on communities (Vázquez *et al.* 2017)?

69 We focus on populations near the edges of a species range, which constitute the front-line of  
70 climate change impacts - although we note that the geographic range edges are not always the most  
71 marginal habitats (Vilà-Cabrera *et al.* 2019, Oldfather *et al.* 2020). For vulnerable species with narrow  
72 climatic niches, their overall persistence will typically depend on their ability to advance their ranges.  
73 Species range edges are a unifying point of convergence for ecology (Holt & Keitt 2005) and as such  
74 the impact of climate change on ranges will require the synthesis of numerous strands of ecological  
75 thought (Urban *et al.* 2016). Populations can show greater sensitivity to climate variability towards  
76 the edge of their existing range, as observed for butterflies (Mills *et al.* 2017), tundra shrubs (Myers-  
77 Smith *et al.* 2015), game birds (Williams *et al.* 2003) and mangroves (Cavanaugh *et al.* 2018).

78 Within the multi-decadal time horizon relevant to contemporary responses to climate change,  
79 temporal variability has many components. One key division is between the impacts of long-term  
80 patterns of fluctuations in climatic variables (described by measures such as variance and  
81 autocorrelation) and the impacts from individual discrete ‘extreme weather events’ defined either  
82 by their statistical unlikeliness or through the breaching of particular physiological thresholds (Smith

2011; Bailey & van de Pol 2016). Drawing a sharp line between long-term and discrete impacts of a variable climate is challenging, as individual extreme events are ultimately part of the ‘background’ variability observed over sufficient time. However, at the intermediate time scales of climate change concern, valuable insights can be gained from considering both aspects.

Variability acts on each species in a community through numerous direct and indirect routes (Figure 1a). We structure our discussion by dividing the diversity of processes into those impacting the long-term viability of a population (Figure 1b), and processes affecting colonisation of new areas, drawing from ideas from invasion ecology. Using simple models, we then show how these processes can interact at all levels and how recent developments in techniques to partition the impact of variability can inform on the importance of different processes. We argue that the interrogation of parameterised models can help overcome the challenge of synthesizing insights from across ecological subfields.

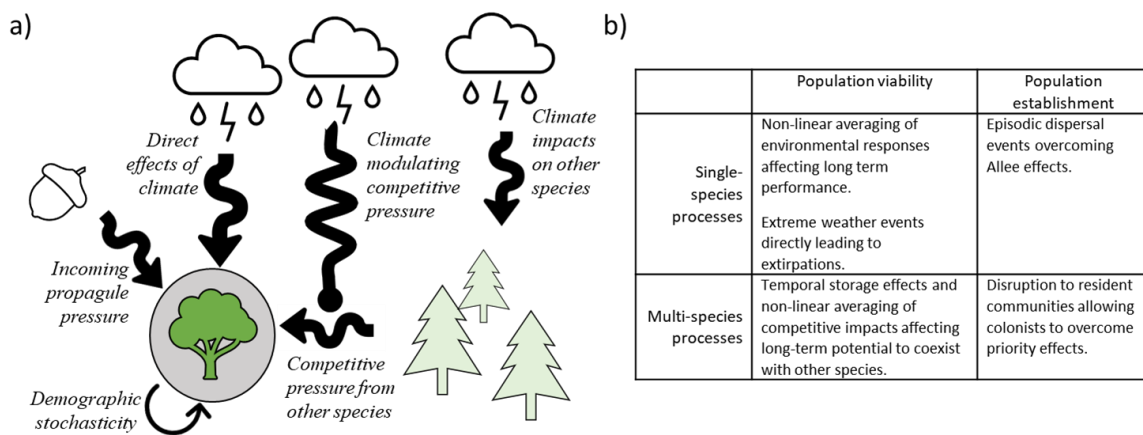

**Figure 1.** a) Schematic of principal routes by which variability influences a focal species at a site (circled). Climatic variability influences the focal population in three ways: directly influencing its reproductive rate, varying propagule pressure and through impacts of competitors (here represented as conifers). Overall competitive pressure can vary through fluctuating competitor numbers (which can be environmentally driven) and by varying modulation of the impact of competition exerted by the competitor. Variability generating processes internal to the focal population, such as demographic stochasticity, can interact with the externally driven variation. b) Categorisation of impacts of variability in determining species ranges and response to

103 climate change discussed here. The mechanisms are categorised by organisational scale and whether they  
104 influence the ability for a species to persist at a site (its population viability) or the capacity for the species to  
105 establish new populations to shift their range.

## 106 Variability and single-population growth rate

107 The direct impacts of climate variability on the viability of individual populations are widely  
108 appreciated (Lande 1993; Lawson *et al.* 2015), and so we only briefly review them here. Extensive  
109 analytical and experimental work demonstrates a long-term impact of a fluctuating climate on  
110 population growth rates (Ruel & Ayres 1999; Drake 2005; Melbourne & Hastings 2008; Thompson *et al.*  
111 *al.* 2013; Vasseur *et al.* 2014; Lawson *et al.* 2015). Average growth rates over the long term may be  
112 considerably different to population growth rates at average environmental conditions. Through  
113 non-linear averaging, the net impact of a variable climate on an individual species' growth rate can  
114 be either positive or negative (Figure 2). The principal determinant of the direction of the effect is  
115 the curvature of the growth rate's response to the relevant climate variable. However, higher-order  
116 properties such as temporal autocorrelation can also play a role (Petchey *et al.* 1997; Heino *et al.*  
117 2000). Many populations near the edge of their range show greater population variability and  
118 climate sensitivity (Myers-Smith *et al.* 2015; Mills *et al.* 2017) and so may be expected to be  
119 particularly responsive to these effects.

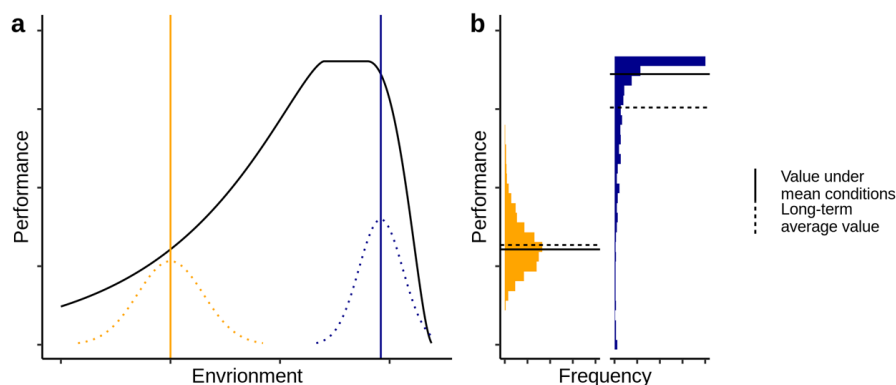

120

121 **Figure 2** How the curvature of environmental performance curves (EPCs) affects average performance. a) The

122 black line shows a classically shaped environmental performance curve where the key environmental variable

123 is temperature, while the dashed lines show relative frequency of environmental conditions at two sites  
124 (yellow and blue). b) shows histograms of observed performances across 1000 random environmental draws  
125 at each site. At the yellow site, environmental variability is fairly large, but the curvature of the performance  
126 curve is relatively shallow. The long-term average value (dashed line) is therefore very similar to the value  
127 under mean conditions (solid line). At the blue site, although the variability is smaller, the local EPC curvature  
128 is much larger and downwards. The long-term value average value is considerably lower than the value under  
129 mean conditions. It also includes several instances that could be labelled extreme events, where the  
130 performance is very markedly below average.

131 Individual extreme events have most commonly been associated with population declines and  
132 heightened extinction risk, in particular when harsh climatic conditions push populations down to a  
133 level where they are vulnerable to extinction (Lande 1993; Boyce *et al.* 2006; Jongejans *et al.* 2010;  
134 Nadeau *et al.* 2017; Maxwell *et al.* 2019). Extreme events have been associated with extinction risk  
135 (Román-Palacios & Wiens 2020) and abrupt changes in community composition (Turner *et al.* 2020).  
136 Range contractions and community shifts have also been seen in many communities, including  
137 butterflies (de Palma *et al.* 2017), tropical fish (Lenanton *et al.* 2017), kelp (Smale & Wernberg 2013)  
138 and bumblebees (Soroye *et al.* 2020). Extreme events have led to extirpations from newly colonised  
139 areas, and it has been suggested that this may slow species responses to climate change (Nadeau *et*  
140 *al.* 2017). For example, extreme cold events have been associated with range retractions of invasive  
141 marine invertebrates (Canning-Clode *et al.* 2011) and fish (Rehage *et al.* 2016).

142 Taken together, both long- and short-term impacts of variability are more commonly viewed as  
143 having negative consequences for populations of conservation interest. However, as we shall show,  
144 when considering the wider community context in which species exist, this baseline assumption may  
145 need to be adjusted.

## 146 Impacts of variability on longer term coexistence

147 Where there is biotic control of species distributions, range limits become fundamentally a problem  
148 of coexistence (Shea & Chesson 2002; Usinowicz & Levine 2018). This framing unlocks for climate  
149 change research a long and rich history of work examining the influence of temporal environmental  
150 variability on coexistence (Levins 1979). The potential for temporal variability to enhance  
151 coexistence is well attested empirically (Adler *et al.* 2006; Tucker & Cadotte 2013; Tucker & Fukami  
152 2014; Usinowicz *et al.* 2017; Hallett *et al.* 2019). Contrary to conclusions drawn in early and still  
153 influential literature (e.g. Hutchinson 1961), environmental fluctuations themselves are not  
154 sufficient to support coexistence of competing species (Chesson & Huntly 1997; Fox 2013) and can  
155 hinder as much as facilitate coexistence. The framework of modern coexistence theory (MCT,  
156 Chesson 2000) has been developed to robustly understand the impact of variability on coexistence.  
157 However, this body of theoretical work examining the problem of species coexistence is only  
158 recently being applied to climate change in the context of spatially heterogeneous environments  
159 (Usinowicz & Levine, 2018).

160 At its core, MCT defines and investigates coexistence in terms of the capacity for populations to  
161 grow from rare in the presence of competing species - the invasion criterion (Grainger *et al.* 2019b).  
162 Where all species are able to meet this criterion, they can each resist exclusion by the other species.  
163 In order to simplify the following discussion, we assume that only the ability of a particular focal  
164 species to persist at a site alongside one or more competitor species is in question. Through MCT,  
165 precise principles have been developed to identify how temporal variability influences coexistence  
166 by quantifying the effects of temporal variability on the long-term average growth rate when the  
167 focal species is at low densities ( $\overline{r_{inv}}$ , Chesson & Warner 1981; Chesson & Huntly 1997; Amarasekare  
168 *et al.* 2004; Snyder 2008).

169 Since MCT is grounded in analytic results obtained for highly general models it can be applied to  
170 most models of population dynamics. This requires conceptually separating direct impacts of the  
171 environment on the focal population's growth rate from the impacts exerted by competitors. This  
172 separation is delicate because competitors can affect the focal species directly, but also indirectly



173 through shared resources - defined broadly to include physical resources such as nutrients, water or  
174 space, as well as through apparent competition mediated by natural enemy populations (Chesson &  
175 Kuang 2008). These routes of impact are the 'limiting factors' of MCT and can realise considerable  
176 analytical insight but also interpretational challenges (for a recent comprehensive review, see  
177 Barabás *et al.* 2018). However, as we shall show below, essential insights can be gained directly  
178 from a model that can describe how the growth rate of the population  $r$  depends on the  
179 environment ( $E$ ) and the competitive impact ( $C$ ),  $r = f(E, C)$ , abstracting over the underlying  
180 mechanisms (Ellner *et al.* 2019). Where direct effects of environmental drivers and impacts of  
181 competitors contribute linearly and additively to the population growth of the focal species, any  
182 variability averages out in the long term. MCT can be used to describe how deviations from the  
183 linear, additive base case lead to long-term effects of variability on population growth. These  
184 deviations can be understood in terms of two classes of impacts – temporal 'storage effects' and  
185 non-linearity of competitive effects.

186 Temporal storage effects arise when the combined effects of the environment and competition  
187 allow benefits accrued in certain years to compensate for losses in other years (Chesson & Warner  
188 1981). For this to affect long-term persistence two conditions must be met. Firstly, there must be an  
189 interaction between the direct impacts of the environmental conditions and the impacts of the  
190 competitor on the growth rate (mathematically this is non-additivity, where  $\frac{\partial^2 r}{\partial E \partial C} \neq 0$ ). For  
191 example, a species may suffer proportionally less from competitors in a year of harsh environment if  
192 the population is buffered in some way such that the combined effect of a harsh environment and  
193 competitive pressure is capped (Fig 3ai). Secondly, the environmental variability must affect the  
194 competitive impacts on the focal species (i.e.  $E$  and  $C$  must co-vary, Figure 3aii). In the classic case  
195 with buffered (subadditive) population growth, the more negative this covariance, the greater the  
196 beneficial effect to the focal population. However, it is worth noting that temporal storage effects  
197 can be reversed if the biotic and abiotic impacts on the focal species growth rate are superadditive,

198 i.e. the adverse effects of competition are proportionally greater in a harsh year (e.g. Holt & Chesson  
199 2014). In the context of climate change, there is a risk that the current patterns of covariation in  
200 species' responses to the environment could change. For example, if climate change results in more  
201 frequent universally 'bad' (or equally, universally 'good') periods, instead of a back-and-forth of  
202 alternate species being favoured, overall covariance in species responses could become more  
203 positive and further undermine coexistence.

204 The second mechanism arises directly from fluctuations in the impact of other species on the growth  
205 rate of the focal species. Non-linear averaging of varying biotic impacts on the focal species' growth  
206 can affect  $\overline{r_{inv}}$ , analogous to the non-linear averaging of abiotic environmental fluctuations on  
207 population growth rates described in the section above (Fig 2), and with matching consequences for  
208 shifts in climatic variability patterns (Fig 3b). These fluctuations in the biotic pressure can be driven  
209 by changes in the abundance of competitor species, or via varying per-capita intensity of the  
210 competition exerted by other species through fluctuations in shared resources. When examining  
211 coexistence, this is the mechanism of 'relative nonlinearity' that describes how species can  
212 differentiate themselves through their capacity to take advantage of variable environments - 'slow-  
213 and-steady' versus 'boom-or-bust' dynamics (Armstrong & Mcgehee 1980). Notably, in contrast to  
214 temporal storage effects, this does not directly rely on correlations in species response to the  
215 environment and can also derive from other fluctuation generating mechanisms.

## a. Temporal ‘Storage Effect’

i Non-independence between biotic and abiotic impacts

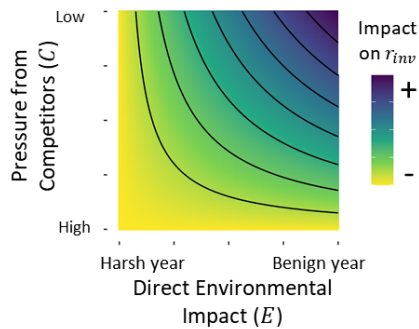

ii Covariance through time of biotic and abiotic impacts

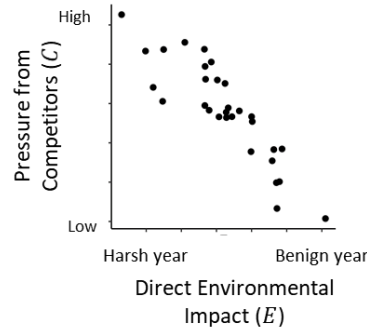

## b. Non-linear averaging of biotic pressures

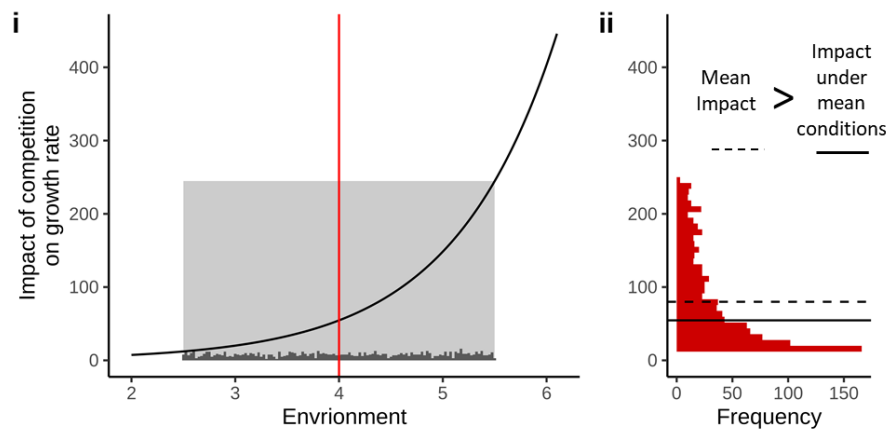

216

217 **Figure 3** Illustration of the conditions required for the two multi-species mechanisms by which environmental  
 218 variability can impact persistence. a) Temporal storage effects describe how species are able to divide niche  
 219 opportunities afforded by a variable climate between them. For this to influence the long-term average  
 220 population growth rate, there are two conditions: i) competitors and the environment must interact in how  
 221 they determine growth rate, and ii) the impact of competition and direct effects of the environment must  
 222 correlate through time. Here each dot represents a year and pressure from the competitor tends to be lower  
 223 in a benign year for the focal species. This could derive from the two species prospering in different conditions.  
 224 b) Non-linear averaging of the impact of biotic pressures can result in an overall impact on average population  
 225 growth rate that differs from the impact under mean conditions. Here we show a case of environmentally  
 226 determined impact of competition. The determinants of the net effects of non-linearities of biotic impacts  
 227 have similar drivers to the single-species mechanisms described in Fig.2, depending on both the pattern of  
 228 environmental variability and the curvature of species responses.

229 The foundation for identifying the relative strengths of these processes in a real system is the  
230 construction of a simple parameterised model. With that in hand, approaches such as that proposed  
231 by Ellner *et al.* (2019) can be used to partition  $\overline{r_{inv}}$  into contributions of different single-species and  
232 multi-species aspects of variability, without the need for complex analytical work and overcoming  
233 limitations incurred by approximations made in the analytic theory. We describe this approach in  
234 Figure 4 and in SI 2. In a recent example, Armitage and Jones (2020) used a model of competition  
235 between two species of duckweed to show that the inferior competitor's poleward range limit is  
236 better predicted when taking into account the impact of temporal fluctuations. Using a partitioning  
237 approach, they found this was dominated by nonlinearity in direct temperature responses, with a  
238 smaller contribution of non-linearities in competition and minimal impact of temporal storage  
239 effects attributable to the positively correlated species responses.

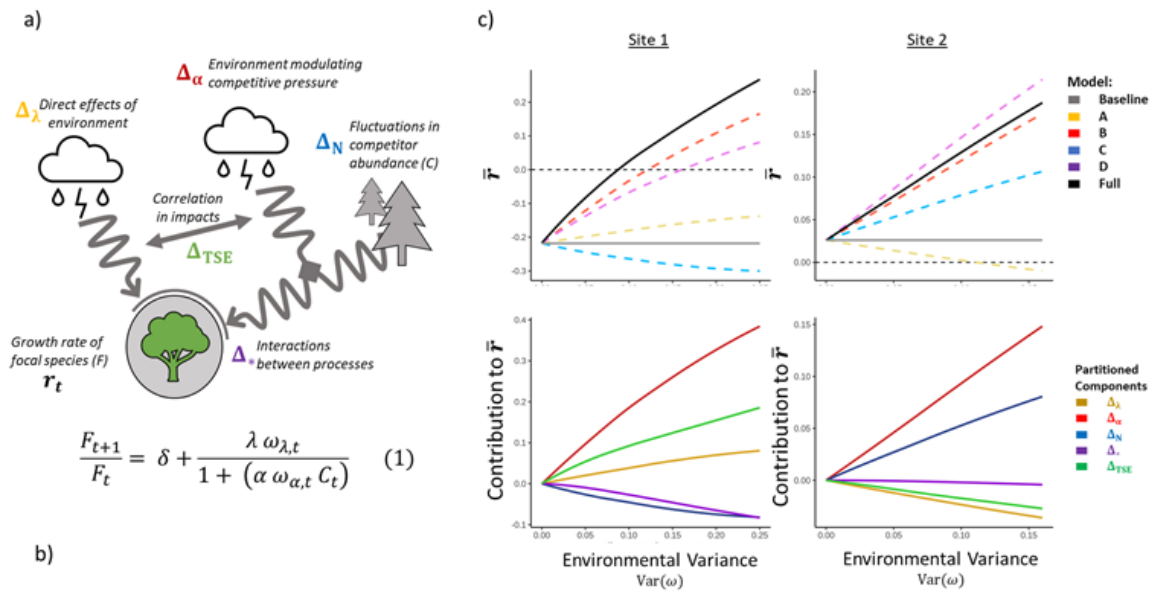

| Model    | Processes:                                                                            |                               |                                              |                      |                                      |                        |
|----------|---------------------------------------------------------------------------------------|-------------------------------|----------------------------------------------|----------------------|--------------------------------------|------------------------|
|          | Components:                                                                           | Direct effects of environment | Environment effect on per-capita competition | Competitor abundance | Interactions between non-linearities | Correlation in impacts |
| Baseline | $\bar{r}_0$                                                                           | Fixed                         | Fixed                                        | Fixed                | Absent                               | Absent                 |
| A        | $\bar{r}_0 + \Delta_\lambda$                                                          | Variable                      | Fixed                                        | Fixed                | Absent                               | Absent                 |
| B        | $\bar{r}_0 + \Delta_\alpha$                                                           | Fixed                         | Variable                                     | Fixed                | Absent                               | Absent                 |
| C        | $\bar{r}_0 + \Delta_N$                                                                | Fixed                         | Fixed                                        | Variable             | Absent                               | Absent                 |
| D        | $\bar{r}_0 + \Delta_\lambda + \Delta_N + \Delta_\alpha + \Delta_\cdot$                | Variable                      | Variable                                     | Variable             | Present                              | Set to zero            |
| Full     | $\bar{r}_0 + \Delta_\lambda + \Delta_N + \Delta_\alpha + \Delta_\cdot + \Delta_{TSE}$ | Variable                      | Variable                                     | Variable             | Present                              | Present                |

240

241 **Figure 4.** Summary of the steps required to investigate impact of temporal variability through the partitioning

242 method of Ellner et al (2019) and two examples. Full details are given in SI 2. a) Firstly, establish the processes

243 involved and build a model of the population dynamics to calculate the long-term growth rate ( $\bar{r}_{inv}$ ). In our

244 model, rate of population change when rare at each time point is given by Eq (1), where  $\delta$  = carryover from the

245 previous generation,  $\lambda$  = fecundity in the absence of competitors,  $\alpha$  = per-capita competitive coefficient. Since

246 we assume the focal species is rare it includes no intra-specific competition. The impact of a variable climate

247 on competition and intrinsic growth rate at each time step is determined by the two  $\omega$  terms, which are

248 correlated at each time step  $t$ . The population density of the competitor ( $C_t$ ) also fluctuates through time.  $\bar{r}$  is

249 found from the mean of  $\log(F_{t+1}/F_t)$  over a sufficiently large number of trials. b) Secondly, systematically

250 alter the inputs of the growth rate model by sequentially fixing different fluctuating terms to their average

251 values or removing correlations between variable components. Choices of which aspects to fix, and in which

252 combination will allow different partitioning. Here we partition the difference between the growth rate under  
253 fully fixed conditions ( $\overline{r_0}$ ) and under the ‘observed’ variable conditions ( $\overline{r_{inv}}$ ) with five  $\Delta$ -partitions:  $\overline{r_{inv}} =$   
254  $\overline{r_0} + \Delta_\lambda + \Delta_N + \Delta_\alpha + \Delta_* + \Delta_{TSE}$ , corresponding to the processes identified in a). Differences between the  
255 model variants allow the identification of the relative influence of each partition. c) Examples of how the  
256 partitioning approach can illustrate how variability can have multiple counteracting consequences for a  
257 species’ ability to persist. We use two example parameterisations of the same underlying model, Site 1 (left)  
258 and Site 2 (right). At Site 1 without variability,  $\overline{r_0}$  is negative, and the focal species would not be expected to  
259 persist. The full model (black line) suggests that with a climate variability above 0.08 persistence is possible.  
260 Inspection of the partitions (below) shows that the two largest positive impacts are non-linearities in the  
261 impact of competition ( $\Delta_\alpha$ ) and temporal storage effects ( $\Delta_{TSE}$ ). Opposing this, variability in the abundance of  
262 competitors ( $\Delta_N$ ) is detrimental to the focal species. The impact of variability directly on the growth rate of the  
263 focal species ( $\Delta_\lambda$ ) is here relatively small, and insufficient to lead to persistence in the range of variabilities  
264 examined. The interaction term between the processes ( $\Delta_*$ ) is negative but small. Note that at low levels of  
265 variability  $\Delta_*$  is slow to increase, showing that the other partitions identify the main pathways of low variability  
266 levels. By contrast, at Site 2, variability in the growth rate of the focal species has a negative impact ( $\Delta_\lambda$ ), and if  
267 it was the only process considered might be expected to prevent persistence at the site. There is also a  
268 negative temporal storage effect ( $\Delta_{TSE}$ ), deriving from a positive correlation between competitive impact and  
269 intrinsic growth rate in the underlying model. However, these two effects are more than counteracted by  
270 strong positive contributions from non-linearities in both competitive effect ( $\Delta_\alpha$ ) and abundance of  
271 competitors ( $\Delta_N$ ). In this case the role of interactions between non-linearities ( $\Delta_*$ ) remains small.

272 Earlier theoretical work placed greater emphasis on temporal storage effects, but in the small  
273 number of empirical cases where the relative impact of the two effects on coexistence has been  
274 directly compared, relative nonlinearity was found to have comparable, or greater, impact than the  
275 more widely appreciated storage effects (Letten *et al.* 2018; Hallett *et al.* 2019; Zepeda & Martorell  
276 2019). Although to date the number of examples is small, it is clear that climate-driven shifts in  
277 variability patterns could play a role in determining coexistence between competitors and range  
278 limits in the future. While we have focussed here on competitive systems, consumer-resource  
279 systems can be analysed in parallel ways (Dee *et al.* 2020; Shoemaker *et al.* 2020a). However, effects

280 identified in simple communities may not necessarily directly translate to more complex systems  
281 (Barabás *et al.* 2018, Song *et al.* 2019). Species respond to different parts of the environment - with a  
282 greater diversity of species, it is quite possible that species-level fluctuations in competition may  
283 average out at the community level. For example, Clark *et al.* (2010) found that different tree species  
284 responded to different aspects of the overall environmental fluctuations. This may suggest that  
285 these mechanisms may be strongest where a limited pool of species are involved in constraining the  
286 range of the focal species.

## 287 Community impacts of discrete events

288 A species' range expansion in response to climate change is effectively a series of invasions into new  
289 communities (Wallingford *et al.* 2020). From this perspective, the significant body of work  
290 investigating variability within invasion biology, going back to Elton (1958) and beyond, can offer  
291 useful insights. The ability of a species to persist at a site is only one half of the picture – a species  
292 must first arrive and establish itself. The spread of a species into new areas can be slowed or even  
293 prevented by disadvantages that potential invaders face. For instance, positive density dependence  
294 at low population densities (Allee effects, Courchamp *et al.* 1999; Kramer *et al.* 2018) can cause  
295 leading range edges to appear 'pinned' in place (Keitt *et al.* 2001) and slow the rate of invasion into  
296 newly suitable environments (Taylor & Hastings 2005).

297 Environmental variability can play a role in shifting a community from one state to another by  
298 allowing species to overcome the challenges of Allee effects through intermittent boosts in  
299 performance (Dennis 2002). Discrete extreme weather events can have marked influence on the  
300 trajectory of species responses to climate change, but pose considerable challenges to investigation  
301 and prediction (Bailey & van de Pol 2016). Although direct evidence is challenging to find (see later  
302 sections), extreme climatic events have been associated with the arrival into marine communities of  
303 species previously found in warmer areas (Wernberg *et al.* 2013). Dispersal is intrinsically episodic  
304 (e.g. Kennedy *et al.* 2020) and short term spikes in the number of incoming colonist propagules may

305 help increase establishment compared to constant dispersal rates by overcoming thresholds induced  
306 by Allee effects (Drake & Lodge 2006; Carr *et al.* 2019).

307 At the community level, biotic resistance from the resident species can slow or prevent a colonist  
308 tracking its climatic niche (Urban *et al.* 2012; Legault *et al.* 2020). Whether this resistance is  
309 considered a hindrance or beneficial will depend on the conservation status and impact of the  
310 colonist and resident species concerned. Over longer time scales, a history of disturbance can shape  
311 a community's biotic resistance through selective assembly (Miller *et al.* 2021) or through specific  
312 adaptations to the local conditions, which may include levels of variability (Urban & de Meester  
313 2009), although temporal variability in climate could also preclude such local adaptation from  
314 occurring (Bridle *et al.* 2010).

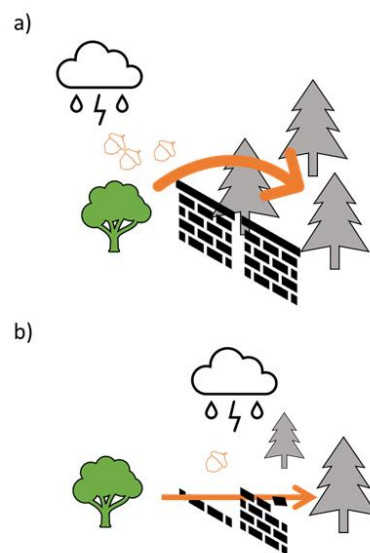

315

316 **Figure 5** Illustration of two ways in which climatic variability can overcome barriers to range shifts. a) through  
317 episodic high-dispersal events, and b), by disrupting existing communities and reducing biotic resistance.

318 Even without local adaptation, priority effects can give residents considerable advantages compared  
319 to potential invaders. Where priority effects are strong, an invading species can colonise only if  
320 either the density of the resident is brought down from equilibrium, or the invader is otherwise able  
321 to reach sufficiently high densities to exert significant competitive pressure on the resident.

322 Individual disturbance events can temporarily break down blocking effects (Davis *et al.* 2000;



323 Melbourne *et al.* 2007; Diez *et al.* 2012), for example in grasslands (Pinto & Ortega, 2016) and over  
324 the longer term there is an expectation that in disturbed environments there are more unused  
325 available resources for invaders to take advantage of (Davis *et al.* 2000; Diez *et al.* 2012). Tucker and  
326 Fukami (2014) showed experimentally that temperature variability can allow priority effects to be  
327 overcome in a nectar-yeast system. Ecological theory can play a key role in identifying cases where  
328 individual key events could precipitate the establishment of a climate refugee species. The core  
329 results of MCT can be applied to invasions (Shea & Chesson, 2002; MacDougall *et al.*, 2009) and are a  
330 useful guide to identifying where priority effects are impactful (Ke & Letten 2018; Grainger *et al.*  
331 2019a; Uricchio *et al.* 2019) particularly where the growth rate of a colonising species can also be  
332 affected by variability (Clark & Johnston 2011).

## 333 Interactions between influences of variability

334 There have been frequent calls to improve the representation of communities in ecosystem-change  
335 models (Gilman *et al.* 2010; Angert *et al.* 2013; Urban *et al.* 2013). Synthesising the aggregate impact  
336 of variability will require an expansion in the scope of models currently used (Felton & Smith  
337 2017). When considering whole communities, the diversity of possible impacts on a focal species  
338 due to variability is considerably larger than in the single-species case. The previous three sections  
339 demonstrated the breadth of direct and indirect ecological impacts that variability can have on how  
340 species will respond to climate change. Faced with such a diverse set of processes, reconciling the  
341 assorted influences of variability and determining how they interact is central to determining their  
342 influence in practice. There are fundamentally different scales and mechanisms at work, but bottom-  
343 up mechanistic modelling can illustrate the key interactions at play. Identifying and (equally  
344 importantly) ruling out for practical purposes, interactions between stressors is crucial to meaningful  
345 conservation interventions (Côté *et al.* 2016).

346 To this end, a number of modelling studies have explored the interface between local variability-  
347 mediated coexistence and extinction risk (Adler & Drake 2008; Gravel *et al.* 2011; Danino *et al.* 2018;

348 Pande *et al.* 2019; Schreiber *et al.* 2019; Dean & Shnerb 2020). Populations at low densities may be  
349 expected to benefit the most from variability-mediated coexistence mechanisms, but a low  
350 population size is also risky if a single bad year could extirpate the population. In these models, the  
351 relative strengths of stochastic extinction risk and competitive stabilization change across a gradient  
352 of environmental variability. In the largest empirical analysis of this balance to date, Fung *et al.*  
353 (2020) used forest plot data to quantify how variability leads to temporal niche partitioning and  
354 extinction risk and found that the balance was uneven but more frequently detrimental to  
355 coexistence.

356 A useful way of framing complex climate change responses into a single unified measure of impact is  
357 through establishment and extinction lags - differences between climate change and species range  
358 responses (Alexander *et al.*, 2018). The core issues can be demonstrated in relatively simple  
359 simulation models constructed to capture multiple processes and forms of variability  
360 simultaneously. In Figure 6 we demonstrate the potential for complex interactions between  
361 mechanisms using a simple model of competition (detailed in SI 3) between a resident species and a  
362 climate migrant. As already shown in Figure 4, the response expected from a change in variability  
363 due to one mechanism could be countered or even reversed in conjunction with other processes.  
364 Given the multitude of theoretically and empirically identified effects of climate variability on  
365 colonisation success under climate change, there is a need to develop and investigate such models  
366 to understand when interactions between these effects are likely to be influential.

367

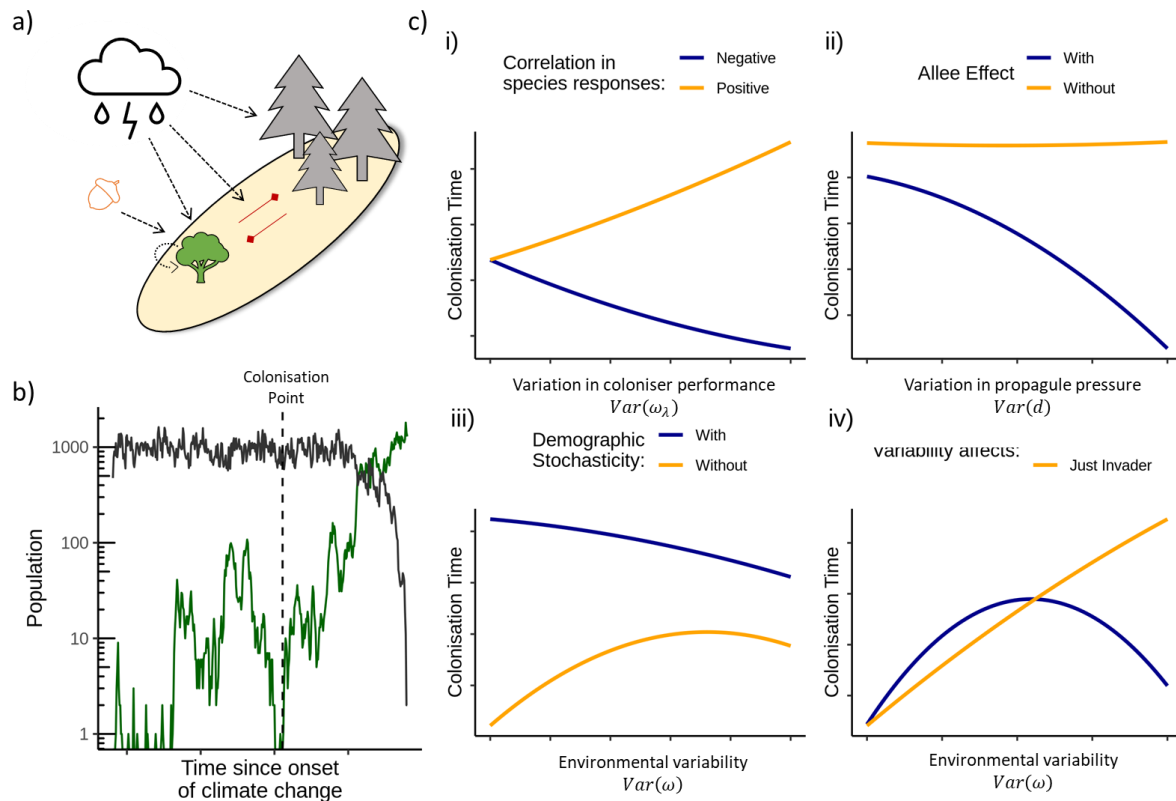

368

369

370

371

372

373

374

375

376

377

378

379

380

381

382

383

384

**Figure 6** Demonstration of interactions between impacts of environmental fluctuations on climate-driven colonisation in a simple two-species competition model. a) The core model is an extension of that discussed in Figure 4 and is detailed in SI 3. Initially the site is dominated by a resident species and subject to immigration pressure from a potential coloniser. Over time, the environment becomes increasingly favourable for the coloniser and eventually it will displace the resident. We introduce dynamical features or additional sources of variability and observe how average colonisation times respond to changes in certain aspects of variability. Here, we measure the time point from the onset of climate change when the coloniser is permanently established (b). c) Four examples of interaction between model processes, shown with smooth lines through 500 trials: i) as variability in the coloniser's performance rises, colonisation occurs more rapidly with increased variability where there is a negative correlation (blue) between the performance of the resident and the coloniser, as temporal storage effects aid establishment. However, where the competitor responses are positively correlated (yellow) colonisation is slowed by variability, ii) variability in incoming propagule pressure accelerates the colonisation only where there are strong Allee effects to overcome, iii) a colonisation delay with environmental variability can be reversed where there is demographic stochasticity that can lead to extinction at low densities, iv) the beneficial effect of variability for the coloniser can be reversed when it affects both species.

385 Building on small and focused models, larger, highly generalised and spatially-explicit  
386 metacommunity models (O'Sullivan *et al.* 2019; Thompson *et al.* 2020) can also provide insight into  
387 potential drivers of community change that emerge from combining processes at multiple scales  
388 (Usinowicz & Levine 2018; Chase *et al.* 2020). However, interpreting such models to assess the  
389 impact of variability poses distinct challenges, beyond parameterisation. It is rarely possible to  
390 directly control multiple aspects of variability simultaneously, even in an artificial model. Temporal  
391 variability is inherently multi-faceted and additional qualities beyond direct variance can have  
392 significant impacts, e.g. autocorrelation (Levine & Rees 2004). To take one illustrative example, the  
393 historical level of variability a community (real or *in silico*) experienced during its assembly  
394 contributes to the capacity of the community to respond to future changes, whether that is through  
395 direct adaptation of the species in a community to local levels of variability or by the extant species  
396 having passed through a previous extinction filter during historical extreme events (Janzen 1967;  
397 Nadeau *et al.* 2017; Medeiros *et al.* 2020; Miller *et al.* 2021).

## 398 Identifying processes in the real world

399 The next frontier is directly assessing the magnitude of these effects in real systems. Understanding  
400 which aspects of variability are most influential will be key to building models of minimal necessary  
401 complexity. Determination of the relative contributions of dispersal, interspecific interactions and  
402 environmental dependence has been identified as the key challenge to understanding the dynamics  
403 of whole communities (Leibold *et al.* 2020). There is evidence that biotic resistance to invasive  
404 species is widespread, but the global contribution of biotic resistance to climate refugee species is  
405 challenging to measure (Levine & Rees 2004; Alexander *et al.* 2015, 2016; Louthan *et al.* 2015;  
406 Godsoe *et al.* 2017, 2018; Beaury *et al.* 2020).

407 Direct observations demonstrate that species are on the move, but consistent patterns are difficult  
408 to determine and influenced by concurrent land use changes (Lenoir *et al.* 2020). The observed rate

409 of movement of species is highly variable, with many species shifting their ranges considerably faster  
410 or slower than the climate velocity and ultimately dependent on availability of habitat (Platts *et al.*  
411 2019). Competitive exclusion at large spatial scales is often very slow (Yackulic 2017), while  
412 extirpation by extreme events can be rapid, but not necessarily permanent. Any coupling between  
413 species ranges and particular climatic events can be highly idiosyncratic, with multi-year effects of  
414 weather events (Harley & Paine 2009). Coupled with the challenge of accurately identifying the pace  
415 of range shifts (Bates *et al.* 2015), this makes directly discerning a signal of variability in movement  
416 rates an imposing task.

417 Direct observations of variability in natural populations can highlight how species respond differently  
418 to environmental variability (Palmer *et al.*, 2017; Le Coeur *et al.* 2021). Evidence from global satellite  
419 data shows that sensitivity to climate variability is itself variable across the globe (Seddon *et al.*  
420 2016). However, to determine the impact in terms of long-term coexistence, model  
421 parameterisation of some sort is required (e.g. Fung *et al.* 2020; Usinowicz *et al.* 2021). Species traits  
422 hold some promise to identify likely temporal coexistence mechanisms (Adler *et al.* 2013). Life  
423 history traits have been found to relate to sensitivity to climate anomalies in herbaceous perennials  
424 (Compagnoni *et al.* 2021) and amphibians (Cayuela *et al.* 2017), but much work remains to be done in  
425 this area.

426 Mesocosm experiments with manipulation of variability can be illuminating – for example, Zander *et*  
427 *al.* (2017) showed that lower trophic levels of a microbial food web were more strongly affected by  
428 variability than top level consumers. However, such an approach is fundamentally limited since  
429 variability can be manipulated in many alternative valid dimensions unless it is tied directly to  
430 expected climate regimes (Thompson *et al.* 2013). Behavioural adaptation and the role of  
431 microclimates pose further challenges to the interpretation of mesocosm work - the realised  
432 variability of environmental variables relevant to species may differ from that measured by weather  
433 stations (Bladon *et al.* 2020).

434 Alongside the highly generalised ‘strategic’ models demonstrated in the previous section, multiple  
435 impacts of variability need to be tested for in focussed ‘tactical’ case studies of marginal populations  
436 in order to build a picture of the real-world prevalence of these processes. Progress will require not  
437 just more data, but a connected approach to synthesising the multiple impacts of variability, which  
438 in turn requires a reliable model of community dynamics that can incorporate variable conditions. At  
439 the core will be robust models of species performance and competitive impact under different  
440 environmental conditions. This is no easy task – even in two-species systems with a single  
441 environmental variable this requires fitting a multidimensional response surface. Given that species  
442 respond to multiple environmental variables (Clark *et al.* 2010; Tingley *et al.* 2012) there are  
443 fundamental limits to the resolution such models can aim to achieve. Detailed predictions for  
444 individual communities will need to confront measures of environmental performance with  
445 observations of current ranges to best estimate future trajectories (Armitage & Jones 2020;  
446 Twinaime *et al.* 2020). Observations of communities along climate gradients can provide particularly  
447 valuable tests of models designed to investigate climate change (Alexander *et al.* 2016; Tylianakis &  
448 Morris 2017).

449 With a sufficiently supported model in hand, partitioning of the various impacts of variability on  
450 coexistence can be highly informative (Figure 4, Ellner *et al.* 2019; Shoemaker *et al.* 2020a). The  
451 method can be extended to the large scales relevant to climate-change responses (Armitage & Jones  
452 2020). Such a simulation-based partitioning approach could also be applied with other response  
453 variables, for example colonisation or extirpation lags, or extended to include additional variability  
454 terms. Understanding which aspects of variability are most influential can sharpen the focus of  
455 investigations, reducing overall problem complexity and concentrate potential mitigation efforts on  
456 the most critical fluctuations.

457 In support of this, a key line of future theoretical enquiry will be determining the minimum data  
458 requirements to understand the impact of variability. It is not yet known how sensitive partitioning  
459 of variability effects is to model misspecification. The higher-level properties of environmental

460 performance curves, such as their curvature, are considerably harder to estimate than first order  
 461 properties such as thermal optima. Empirical estimates for key parameters can be confounded, with  
 462 each other, with consequences for reliable estimation of species coexistence (Terry *et al.* 2021). The  
 463 implications of parameter uncertainty need to be explicitly acknowledged and better understood.  
 464 Since partitioning is algorithmic, it is possible to propagate uncertainties in the underlying model  
 465 through to uncertainty in the impact of variability on the response of interest.

## 466 Conclusion

| Process                                         | Key determinant of impact                                                                                                          | Possible impact of considering variability in the response to climate change                    |
|-------------------------------------------------|------------------------------------------------------------------------------------------------------------------------------------|-------------------------------------------------------------------------------------------------|
| <i>Single Species</i>                           |                                                                                                                                    |                                                                                                 |
| Non-linear averaging of environmental responses | Curvature of environmental performance curve                                                                                       | Long-term population viability could differ from viability under average conditions             |
| Extreme weather-related population impacts      | Population sensitivity and recovery rates                                                                                          | Generally considered detrimental to population persistence                                      |
| Episodic dispersal                              | Dispersal limitation of range expansion<br>Allee Effects                                                                           | Establishment into new areas may be aided                                                       |
| <i>Multi-Species</i>                            |                                                                                                                                    |                                                                                                 |
| Temporal storage effects                        | Covariance between environmental and competitive impacts on growth rate<br>Non-additivity of environmental and competitive impacts | Consistency of species' environmental responses could be influential in determining persistence |
| Non-linearity of competition/competitive impact | Curvature of competitive impact on growth rate                                                                                     | Long-term population viability could differ from viability under average conditions             |
| Disruptions overcoming priority effects         | Strength of biotic resistance due to priority effects<br>Disturbances reducing biotic resistance                                   | Biotic resistance could be overcome more suddenly than expected                                 |

467 **Table 1** Summary of the impacts climate variability can have on species responses to climate change.

468 Influential interspecific interactions are necessary for the multi-species process to be impactful. Particularly in  
 469 the multi-species processes, more research is needed to determine their prevalence and influence in real  
 470 systems.

471 In Table 1 we summarise the multitude of ecological routes by which underlying temporal variability  
 472 could influence how a species will fare under climate change. It is not currently clear whether the  
 473 difference in emphasis of the impact of variability in different ecological subfields represents a lack

474 of communication, publication bias, or if the relative neglect of the ‘positive’ aspects of variability  
475 within global change biology is because they do not leave a widespread strong imprint on real-world  
476 dynamics. It would be risky to assume that the impacts of variability are already ‘baked-in’ to current  
477 observed species ranges, and so captured by existing distribution models. We reiterate that there  
478 will also be evolutionary processes to consider - interactions between variability and adaptation with  
479 positive and negative consequences for range shifts has been subject of extensive recent reviews  
480 elsewhere (Vázquez et al. 2017; Nadeau & Urban 2019; Thompson & Fronhofer 2019; Coleman &  
481 Wernberg 2020; Lyberger et al. 2021; Miller et al. 2020).

482 At this point in time, we simply do not know whether current assumptions of the impact of  
483 variability based on single-population analyses are systematically over or underestimating risks at  
484 the community level. What we do know is that climate change will present species with a bumpy and  
485 obstacle-filled uphill ride, not a smooth escalator. No single simple theory can predict the effects of  
486 climate variability – but, as we have shown, this does not prevent useful insights cannot being  
487 synthesised. As with most areas of ecology, both complex and simple verbal and mathematical  
488 models have their parts to play. By understanding the linkages between these models, detailed  
489 insights can be gained without losing sight of the whole. More examples of quantification of the  
490 impact of variability in real communities are needed - it is our belief that the simple modelling  
491 frameworks discussed here can meet this need. Building strong bridges between climate change  
492 ecology and coexistence theory has never been more possible, or more necessary.

Adler, P. B., & Drake, J. M. (2008). Environmental variation, stochastic extinction, and competitive coexistence. *American Naturalist*, 172(5). <https://doi.org/10.1086/591678>

Adler, P. B., Fajardo, A., Kleinhesselink, A. R., & Kraft, N. J. B. (2013). Trait-based tests of coexistence mechanisms. *Ecology Letters*, 16(10), 1294–1306. <https://doi.org/10.1111/ele.12157>

Adler, P. B., HilleRisLambers, J., Kyriakidis, P. C., Guan, Q., & Levine, J. M. (2006). Climate variability has a stabilizing effect on the coexistence of prairie grasses. *Proceedings of the National Academy of Sciences of the United States of America*, 103(34), 12793–12798. <https://doi.org/10.1073/pnas.0600599103>

Alexander, J. M., Diez, J. M., Hart, S. P., & Levine, J. M. (2016). When Climate Reshuffles Competitors: A Call for Experimental Macroecology. *Trends in Ecology and Evolution*, 31(11), 831–841. <https://doi.org/10.1016/j.tree.2016.08.003>

Alexander, J. M., Diez, J. M., & Levine, J. M. (2015). Novel competitors shape species’ responses to climate change. *Nature*, 525(7570), 515–518. <https://doi.org/10.1038/nature14952>



- Amarasekare, P., Hoopes, M. F., Mouquet, N., & Holyoak, M. (2004). Mechanisms of coexistence in competitive metacommunities. *American Naturalist*, *164*(3), 310–326. <https://doi.org/10.1086/422858>
- Araújo, M. B., & Luoto, M. (2007). The importance of biotic interactions for modelling species distributions under climate change. *Global Ecology and Biogeography*, *16*(6), 743–753. <https://doi.org/10.1111/j.1466-8238.2007.00359.x>
- Armitage, D. W., & Jones, S. E. (2020). Coexistence barriers confine the poleward range of a globally distributed plant. *Ecology Letters*, *23*(12), 1838–1848. <https://doi.org/10.1111/ele.13612>
- Bailey, L. D., & van de Pol, M. (2016). Tackling extremes: Challenges for ecological and evolutionary research on extreme climatic events. *Journal of Animal Ecology*, *85*(1), 85–96. <https://doi.org/10.1111/1365-2656.12451>
- Barabás, G., D'Andrea, R., & Stump, S. M. (2018). Chesson's coexistence theory. *Ecological Monographs*, *88*(3), 277–303. <https://doi.org/10.1002/ecm.1302>
- Bates, A. E., Bird, T. J., Stuart-Smith, R. D., Wernberg, T., Sunday, J. M., Barrett, N. S., ... Mccarthy, M. (2015). Distinguishing geographical range shifts from artefacts of detectability and sampling effort. *Diversity and Distributions*, *21*(1), 13–22. <https://doi.org/10.1111/ddi.12263>
- Beaury, E. M., Finn, J. T., Corbin, J. D., Barr, V., & Bradley, B. A. (2020). Biotic resistance to invasion is ubiquitous across ecosystems of the United States. *Ecology Letters*, *23*(3), 476–482. <https://doi.org/10.1111/ele.13446>
- Bennie, J., Hodgson, J. A., Lawson, C. R., Holloway, C. T. R., Roy, D. B., Brereton, T., ... Wilson, R. J. (2013). Range expansion through fragmented landscapes under a variable climate. *Ecology Letters*, *16*(7), 921–929. <https://doi.org/10.1111/ele.12129>
- Bernhardt, J. R., Sunday, J. M., Thompson, P. L., & O'Connor, M. I. (2018). Nonlinear averaging of thermal experience predicts population growth rates in a thermally variable environment. *Proceedings of the Royal Society B: Biological Sciences*, *285*(1886), 20181076. <https://doi.org/10.1098/rspb.2018.1076>
- Bladon, A. J., Lewis, M., Bladon, E. K., Buckton, S. J., Corbett, S., Ewing, S. R., ... Turner, E. C. (2020). How butterflies keep their cool: Physical and ecological traits influence thermoregulatory ability and population trends. *Journal of Animal Ecology*, *89*(11), 2440–2450. <https://doi.org/10.1111/1365-2656.13319>
- Boettiger, C. (2018). From noise to knowledge: how randomness generates novel phenomena and reveals information. *Ecology Letters*, *21*(8), 1255–1267. <https://doi.org/10.1111/ele.13085>
- Boyce, M. S., Haridas, C. V., Lee, C. T., Boggs, C. L., Bruna, E. M., Coulson, T., ... Tuljapurkar, S. D. (2006). Demography in an increasingly variable world. *Trends in Ecology and Evolution*, *21*(3), 141–148. <https://doi.org/10.1016/j.tree.2005.11.018>
- Bridle, J. R., Polechová, J., Kawata, M., & Butlin, R. K. (2010). Why is adaptation prevented at ecological margins? New insights from individual-based simulations. *Ecology Letters*, *13*(4), 485–494. <https://doi.org/10.1111/j.1461-0248.2010.01442.x>
- Canning-Clode, J., Fowler, A. E., Byers, J. E., Carlton, J. T., & Ruiz, G. M. (2011). 'Caribbean Creep' Chills Out: Climate Change and Marine Invasive Species. *PLoS ONE*, *6*(12), e29657. <https://doi.org/10.1371/journal.pone.0029657>
- Carr, A. N., Hooper, D. U., & Dukes, J. S. (2019). Long-term propagule pressure overwhelms initial community determination of invader success. *Ecosphere*, *10*(8). <https://doi.org/10.1002/ecs2.2826>
- Cavanaugh, K. C., Osland, M. J., Bardou, R., Hinojosa-Arango, G., López-Vivas, J. M., Parker, J. D., & Rovai, A. S. (2018). Sensitivity of mangrove range limits to climate variability. *Global Ecology and Biogeography*, *27*(8), 925–935. <https://doi.org/10.1111/geb.12751>
- Cayuela, H., Joly, P., Schmidt, B. R., Pichenot, J., Bonnaire, E., Priol, P., ... Besnard, A. (2017). Life history tactics shape amphibians' demographic responses to the North Atlantic Oscillation. *Global Change Biology*, *23*(11), 4620–4638. <https://doi.org/10.1111/gcb.13672>
- Chase, J. M., Jeliaskov, A., Ladouceur, E., & Viana, D. S. (2020). Biodiversity conservation through the lens of metacommunity ecology. *Annals of the New York Academy of Sciences*, *1469*(1), 86–104. <https://doi.org/10.1111/nyas.14378>
- Chen, C., He, B., Yuan, W., Guo, L., & Zhang, Y. (2019). Increasing interannual variability of global vegetation greenness. *Environmental Research Letters*, *14*(12). <https://doi.org/10.1088/1748-9326/ab4ffc>
- Chesson, P. (2000). Mechanisms of Maintenance of Species Diversity. *Annual Review of Ecology, Evolution, and Systematics*, *31*, 343–366.
- Chesson, P., & Huntly, N. (1997). The Roles of Harsh and Fluctuating Conditions in the Dynamics of Ecological Communities. *American Naturalist*, *150*(5), 519–553.

- Chesson, P., & Kuang, J. J. (2008). The interaction between predation and competition. *Nature*, *456*(7219), 235–238. <https://doi.org/10.1038/nature07248>
- Clark, G. F., & Johnston, E. L. (2011). Temporal change in the diversity-invasibility relationship in the presence of a disturbance regime. *Ecology Letters*, *14*(1), 52–57. <https://doi.org/10.1111/j.1461-0248.2010.01550.x>
- Clark, J. S., Bell, D., Chu, C., Courbaud, B., Dietze, M., Hersh, M., ... Wyckoff, P. (2010). High-dimensional coexistence based on individual variation: A synthesis of evidence. *Ecological Monographs*, *80*(4), 569–608. <https://doi.org/10.1890/09-1541.1>
- Coleman, M. A., & Wernberg, T. (2020). The Silver Lining of Extreme Events. *Trends in Ecology & Evolution*, *35*(12), 1065–1067. <https://doi.org/10.1016/j.tree.2020.08.013>
- Compagnoni, A., Levin, S., Childs, D. Z., Harpole, S., Paniw, M., Römer, G., ... Knight, T. M. (2021). Herbaceous perennial plants with short generation time have stronger responses to climate anomalies than those with longer generation time. *Nature Communications*, *12*(1), 1824. <https://doi.org/10.1038/s41467-021-21977-9>
- Côté, I. M., Darling, E. S., & Brown, C. J. (2016). Interactions among ecosystem stressors and their importance in conservation. *Proceedings of the Royal Society B: Biological Sciences*, *283*(1824), 20152592. <https://doi.org/10.1098/rspb.2015.2592>
- Coulson, T., Rohani, P., & Pascual, M. (2004). Skeletons, noise and population growth: the end of an old debate? *Trends in Ecology & Evolution*, *19*(7), 359–364. <https://doi.org/10.1016/j.tree.2004.05.008>
- Courchamp, F., Clutton-Brock, T., & Grenfell, B. (1999). Inverse density dependence and the Allee effect. *Trends in Ecology & Evolution*, *14*(10), 405–410. [https://doi.org/10.1016/S0169-5347\(99\)01683-3](https://doi.org/10.1016/S0169-5347(99)01683-3)
- Danino, M., Kessler, D. A., & Shnerb, N. M. (2018). Stability of two-species communities: Drift, environmental stochasticity, storage effect and selection. *Theoretical Population Biology*, *119*, 57–71. <https://doi.org/10.1016/j.tpb.2017.11.003>
- Davis, A. J., Jenkinson, L. S., Lawton, J. H., Shorrocks, B., & Wood, S. (1998). Making mistakes when predicting shifts in species range in response to global warming. *Nature*, *391*(6669), 783–786. <https://doi.org/10.1038/35842>
- Davis, M. A., Grime, J. P., & Thompson, K. (2000). Fluctuating resources in plant communities: A general theory of invasibility. *Journal of Ecology*, *88*(3), 528–534. <https://doi.org/10.1046/j.1365-2745.2000.00473.x>
- De Palma, A., Dennis, R. L. H., Brereton, T., Leather, S. R., & Oliver, T. H. (2017). Large reorganizations in butterfly communities during an extreme weather event. *Ecography*, *40*(5), 577–585. <https://doi.org/10.1111/ecog.02228>
- Dean, A. M., & Shnerb, N. M. (2020). Stochasticity-induced stabilization in ecology and evolution: a new synthesis. *Ecology*, *101*(9), 1–14. <https://doi.org/10.1002/ecy.3098>
- Dee, L. E., Okamtoto, D., Gårdmark, A., Montoya, J. M., & Miller, S. J. (2020). Temperature variability alters the stability and thresholds for collapse of interacting species: Species Interactions Facing Variability. *Philosophical Transactions of the Royal Society B: Biological Sciences*, *375*(1814). <https://doi.org/10.1098/rstb.2019.0457>
- Dennis, B. (2002). Allee Effects in Stochastic Populations. *Oikos*, *96*(3), 389–401.
- Diez, J. M., D'Antonio, C. M., Dukes, J. S., Grosholz, E. D., Olden, J. D., Sorte, C. J. B., ... Miller, L. P. (2012). Will extreme climatic events facilitate biological invasions? *Frontiers in Ecology and the Environment*, *10*(5), 249–257. <https://doi.org/10.1890/110137>
- Drake, J. M. (2005). Population effects of increased climate variation. *Proceedings of the Royal Society B: Biological Sciences*, *272*(1574), 1823–1827. <https://doi.org/10.1098/rspb.2005.3148>
- Drake, J. M., & Lodge, D. M. (2006). Allee effects, propagule pressure and the probability of establishment: Risk analysis for biological invasions. *Biological Invasions*, *8*(2), 365–375. <https://doi.org/10.1007/s10530-004-8122-6>
- Elton, C. S. (1958). *The ecology of invasions by animals and plants*. Methuen, London.
- Ettinger, A., & HilleRisLambers, J. (2017). Competition and facilitation may lead to asymmetric range shift dynamics with climate change. *Global Change Biology*, *23*(9), 3921–3933. <https://doi.org/10.1111/gcb.13649>
- Felton, A. J., & Smith, M. D. (2017). Integrating plant ecological responses to climate extremes from individual to ecosystem levels. *Philosophical Transactions of the Royal Society B: Biological Sciences*, *372*(1723). <https://doi.org/10.1098/rstb.2016.0142>
- Fey, S. B., & Vasseur, D. A. (2016). Thermal variability alters the impact of climate warming on consumer-resource systems. *Ecology*, *97*(7), 1690–1699. <https://doi.org/10.1890/15-1838.1>

- Fung, T., Chisholm, R. A., Anderson-Teixeira, K., Bourg, N., Brockelman, W. Y., Bunyavejchewin, S., ... Zimmerman, J. (2020). Temporal population variability in local forest communities has mixed effects on tree species richness across a latitudinal gradient. *Ecology Letters*, *23*(1), 160–171. <https://doi.org/10.1111/ele.13412>
- Germain, R. M., Mayfield, M. M., & Gilbert, B. (2018). The ‘filtering’ metaphor revisited: Competition and environment jointly structure invasibility and coexistence. *Biology Letters*, *14*(8). <https://doi.org/10.1098/rsbl.2018.0460>
- Gilman, S. E., Urban, M. C., Tewksbury, J., Gilchrist, G. W., & Holt, R. D. (2010). A framework for community interactions under climate change. *Trends in Ecology & Evolution*, *25*(6), 325–331. <https://doi.org/10.1016/j.tree.2010.03.002>
- Godsoe, W., Franklin, J., & Blanchet, F. G. (2017). Effects of biotic interactions on modeled species’ distribution can be masked by environmental gradients. *Ecology and Evolution*, *7*(2), 654–664. <https://doi.org/10.1002/ece3.2657>
- Godsoe, W., Jankowski, J., Holt, R. D., & Gravel, D. (2018). Which Coexistence Mechanisms Should Biogeographers Quantify? A Reply to Alexander et al. *Trends in Ecology and Evolution*, *33*(3), 145–147. <https://doi.org/10.1016/j.tree.2018.01.003>
- Grainger, T. N., Letten, A. D., Gilbert, B., & Fukami, T. (2019). Applying modern coexistence theory to priority effects. *Proceedings of the National Academy of Sciences*, *116*(13), 6205–6210. <https://doi.org/10.1073/pnas.1803122116>
- Grainger, T. N., Levine, J. M., & Gilbert, B. (2019). The Invasion Criterion: A Common Currency for Ecological Research. *Trends in Ecology & Evolution*, *34*(10), 925–935. <https://doi.org/10.1016/j.tree.2019.05.007>
- Gravel, D., Guichard, F., & Hochberg, M. E. (2011). Species coexistence in a variable world. *Ecology Letters*, *14*(8), 828–839. <https://doi.org/10.1111/j.1461-0248.2011.01643.x>
- Gudmundson, S., Eklöf, A., & Wennergren, U. (2015). Environmental variability uncovers disruptive effects of species’ interactions on population dynamics. *Proceedings of the Royal Society B: Biological Sciences*, *282*(1812), 20151126. <https://doi.org/10.1098/rspb.2015.1126>
- Hallett, L. M., Shoemaker, L. G., White, C. T., & Suding, K. N. (2019). Rainfall variability maintains grass-forb species coexistence. *Ecology Letters*, *22*(10), 1658–1667. <https://doi.org/10.1111/ele.13341>
- Harley, C. D. G., & Paine, R. T. (2009). Contingencies and compounded rare perturbations dictate sudden distributional shifts during periods of gradual climate change. *Proceedings of the National Academy of Sciences of the United States of America*, *106*(27), 11172–11176. <https://doi.org/10.1073/pnas.0904946106>
- Heino, M., Ripa, J., & Kaitala, V. (2000). Extinction risk under coloured environmental noise. *Ecography*, *23*(2), 177–184. <https://doi.org/10.1111/j.1600-0587.2000.tb00273.x>
- Holt, G., & Chesson, P. (2014). Variation in moisture duration as a driver of coexistence by the storage effect in desert annual plants. *Theoretical Population Biology*, *92*, 36–50. <https://doi.org/10.1016/j.tpb.2013.10.007>
- Holt, R. D., & Keitt, T. H. (2005). Species’ borders: A unifying theme in ecology. *Oikos*, *108*(1), 3–6. <https://doi.org/10.1111/j.0030-1299.2005.13145.x>
- Huntingford, C., Jones, P. D., Livina, V. N., Lenton, T. M., & Cox, P. M. (2013). No increase in global temperature variability despite changing regional patterns. *Nature*, *500*(7462), 327–330. <https://doi.org/10.1038/nature12310>
- Hutchinson, G. E. (1961). The paradox of the plankton. *American Naturalist*, *95*(882), 137–145.
- Janzen, D. H. (1967). Why Mountain Passes are Higher in the Tropics. *The American Naturalist*, *101*(919), 233–249.
- Jongejans, E., de Kroon, H., Tuljapurkar, S., & Shea, K. (2010). Plant populations track rather than buffer climate fluctuations. *Ecology Letters*, *13*(6), 736–743. <https://doi.org/10.1111/j.1461-0248.2010.01470.x>
- Ke, P.-J., & Letten, A. D. (2018). Coexistence theory and the frequency-dependence of priority effects. *Nature Ecology & Evolution*, *2*(11), 1691–1695. <https://doi.org/10.1038/s41559-018-0679-z>
- Keitt, T. H., Lewis, M. A., & Holt, R. D. (2001). Allee effects, invasion pinning, and species’ borders. *American Naturalist*, *157*(2), 203–216. <https://doi.org/10.1086/318633>
- Kennedy, J. P., Dangremond, E. M., Hayes, M. A., Preziosi, R. F., Rowntree, J. K., & Feller, I. C. (2020). Hurricanes overcome migration lag and shape intraspecific genetic variation beyond a poleward mangrove range limit. *Molecular Ecology*, *29*(14), 2583–2597. <https://doi.org/10.1111/mec.15513>
- Kraft, N. J. B., Adler, P. B., Godoy, O., James, E. C., Fuller, S., & Levine, J. M. (2015). Community assembly, coexistence and the environmental filtering metaphor. *Functional Ecology*, *29*(5), 592–599. <https://doi.org/10.1111/1365-2435.12345>

- Kramer, A. M., Berec, L., & Drake, J. M. (2018). Editorial: Allee effects in ecology and evolution. *Journal of Animal Ecology*, *87*(1), 7–10. <https://doi.org/10.1111/1365-2656.12777>
- Lande, R. (1993). Risks of Population Extinction from Demographic and Environmental Stochasticity and Random Catastrophes. *The American Naturalist*, *142*(6), 911–927.
- Lawson, C. R., Vindenes, Y., Bailey, L., & van de Pol, M. (2015). Environmental variation and population responses to global change. *Ecology Letters*, *18*(7), 724–736. <https://doi.org/10.1111/ele.12437>
- Le Coeur, C., Storkey, J., & Ramula, S. (2021). Population responses to observed climate variability across multiple organismal groups. *Oikos*, oik.07371. <https://doi.org/10.1111/oik.07371>
- Legault, G., Bitters, M. E., Hastings, A., & Melbourne, B. A. (2020). Interspecific competition slows range expansion and shapes range boundaries. *Proceedings of the National Academy of Sciences of the United States of America*. <https://doi.org/10.1073/pnas.2009701117>
- Leibold, M. A., Rudolph, J., & Blanchet, F. G. (2020). The Internal Structure of Metacommunities. *BioRxiv*, 1–55. <https://doi.org/10.1101/2020.07.04.187955>
- Lenanton, R. C. J., Dowling, C. E., Smith, K. A., Fairclough, D. V., & Jackson, G. (2017). Potential influence of a marine heatwave on range extensions of tropical fishes in the eastern Indian Ocean—Invaluable contributions from amateur observers. *Regional Studies in Marine Science*, *13*, 19–31. <https://doi.org/10.1016/j.rsma.2017.03.005>
- Lenoir, J., Bertrand, R., Comte, L., Bourgeaud, L., Hattab, T., Murienne, J., & Grenouillet, G. (2020). Species better track climate warming in the oceans than on land. *Nature Ecology & Evolution*. <https://doi.org/10.1038/s41559-020-1198-2>
- Letten, A. D., Dhami, M. K., Ke, P. J., & Fukami, T. (2018). Species coexistence through simultaneous fluctuation-dependent mechanisms. *Proceedings of the National Academy of Sciences of the United States of America*, *115*(26), 6745–6750. <https://doi.org/10.1073/pnas.1801846115>
- Levine, J. M., & Rees, M. (2004). Effects of temporal variability on rare plant persistence in annual systems. *American Naturalist*, *164*(3), 350–363. <https://doi.org/10.1086/422859>
- Levins, R. (1979). Coexistence in a Variable Environment. *American Naturalist*, *114*(6), 765–783.
- Louthan, A. M., Doak, D. F., & Angert, A. L. (2015). Where and When do Species Interactions Set Range Limits? *Trends in Ecology & Evolution*, *30*(12), 780–792. <https://doi.org/10.1016/J.TREE.2015.09.011>
- Lyberger, K., Osmond, M. M., & Schreiber, S. J. (2021). Is evolution in response to extreme events good for population persistence? *The American Naturalist*, 714419. <https://doi.org/10.1086/714419>
- MacDougall, A. S., Gilbert, B., & Levine, J. M. (2009). Plant invasions and the niche. *Journal of Ecology*, *97*(4), 609–615. <https://doi.org/10.1111/j.1365-2745.2009.01514.x>
- Maxwell, S. L., Butt, N., Maron, M., McAlpine, C. A., Chapman, S., Ullmann, A., ... Watson, J. E. M. (2019). Conservation implications of ecological responses to extreme weather and climate events. *Diversity and Distributions*, *25*(4), 613–625. <https://doi.org/10.1111/ddi.12878>
- Medeiros, L. P., Boege, K., Del-Val, E., Zaldívar-Riverón, A., & Saavedra, S. (2021). Observed Ecological Communities Are Formed by Species Combinations That Are among the Most Likely to Persist under Changing Environments. *The American Naturalist*, *197*(1), E17–E29. <https://doi.org/10.1086/711663>
- Melbourne, B. A., Cornell, H. V., Davies, K. F., Dugaw, C. J., Elmendorf, S., Freestone, A. L., ... Yokomizo, H. (2007). Invasion in a heterogeneous world: Resistance, coexistence or hostile takeover? *Ecology Letters*, *10*(1), 77–94. <https://doi.org/10.1111/j.1461-0248.2006.00987.x>
- Melbourne, B. A., & Hastings, A. (2008). Extinction risk depends strongly on factors contributing to stochasticity. *Nature*, *454*(7200), 100–103. <https://doi.org/10.1038/nature06922>
- Miller, A. D., Inamine, H., Buckling, A., Roxburgh, S. H., & Shea, K. (2021). How disturbance history alters invasion success: biotic legacies and regime change. *Ecology Letters*, *24*(4), 687–697. <https://doi.org/10.1111/ele.13685>
- Miller, T. E. X., Angert, A. L., Brown, C. D., Lee-Yaw, J. A., Lewis, M., Lutscher, F., ... Williams, J. L. (2020). Eco-evolutionary dynamics of range expansion. *Ecology*, *101*(10). <https://doi.org/10.1002/ecy.3139>
- Mills, S. C., Oliver, T. H., Bradbury, R. B., Gregory, R. D., Brereton, T., Kühn, E., ... Evans, K. L. (2017). European butterfly populations vary in sensitivity to weather across their geographical ranges. *Global Ecology and Biogeography*, *26*(12), 1374–1385. <https://doi.org/10.1111/geb.12659>
- Myers-Smith, I. H., Elmendorf, S. C., Beck, P. S. A., Wilkening, M., Hallinger, M., Blok, D., ... Vellend, M. (2015). Climate sensitivity of shrub growth across the tundra biome. *Nature Climate Change*, *5*(9), 887–891. <https://doi.org/10.1038/nclimate2697>
- Nadeau, C. P., & Urban, M. C. (2019). Eco-evolution on the edge during climate change. *Ecography*, *42*(7), 1280–1297. <https://doi.org/10.1111/ecog.04404>

- Nadeau, C. P., Urban, M. C., & Bridle, J. R. (2017). Climates Past, Present, and Yet-to-Come Shape Climate Change Vulnerabilities. *Trends in Ecology & Evolution*, 32(10), 786–800. <https://doi.org/10.1016/j.tree.2017.07.012>
- O'Brien, E. K., Higgie, M., Reynolds, A., Hoffmann, A. A., & Bridle, J. R. (2017). Testing for local adaptation and evolutionary potential along altitudinal gradients in rainforest *Drosophila*: beyond laboratory estimates. *Global Change Biology*, 23(5), 1847–1860. <https://doi.org/10.1111/gcb.13553>
- Palmer, G., Platts, P. J., Brereton, T., Chapman, J. W., Dytham, C., Fox, R., ... Thomas, C. D. (2017). Climate change, climatic variation and extreme biological responses. *Philosophical Transactions of the Royal Society B: Biological Sciences*, 372(1723). <https://doi.org/10.1098/rstb.2016.0144>
- Pande, J., Fung, T., Chisholm, R., & Shnerb, N. M. (2019). Mean growth rate when rare is not a reliable metric for persistence of species. *Ecology Letters*, ele.13430. <https://doi.org/10.1111/ele.13430>
- Parmesan, C., & Yohe, G. (2003). A globally coherent fingerprint of climate change. *Nature*, 421, 37–42. <https://doi.org/10.1038/nature01286>
- Pecl, G. T., Araújo, M. B., Bell, J. D., Blanchard, J., Bonebrake, T. C., Chen, I. C., ... Williams, S. E. (2017). Biodiversity redistribution under climate change: Impacts on ecosystems and human well-being. *Science*, 355(6332). <https://doi.org/10.1126/science.aai9214>
- Petchey, O. L., Gonzalez, A., & Wilson, H. B. (1997). Effects on population persistence: the interaction between environmental noise colour, intraspecific competition and space. *Proceedings of the Royal Society B: Biological Sciences*, 264, 1841–1847.
- Pinto, S. M., & Ortega, Y. K. (2016). Native species richness buffers invader impact in undisturbed but not disturbed grassland assemblages. *Biological Invasions*, 18(11), 3193–3204. <https://doi.org/10.1007/s10530-016-1208-0>
- Platts, P. J., Mason, S. C., Palmer, G., Hill, J. K., Oliver, T. H., Powney, G. D., ... Thomas, C. D. (2019). Habitat availability explains variation in climate-driven range shifts across multiple taxonomic groups. *Scientific Reports*, 9(1), 1–10. <https://doi.org/10.1038/s41598-019-51582-2>
- Rehage, J. S., Blanchard, J. R., Boucek, R. E., Lorenz, J. J., & Robinson, M. (2016). Knocking back invasions: Variable resistance and resilience to multiple cold spells in native vs. nonnative fishes. *Ecosphere*, 7(6), 1–13. <https://doi.org/10.1002/ecs2.1268>
- Renton, M., Shackelford, N., & Standish, R. J. (2014). How will climate variability interact with long-term climate change to affect the persistence of plant species in fragmented landscapes? *Environmental Conservation*, 41(2), 110–121. <https://doi.org/10.1017/S0376892913000490>
- Román-Palacios, C., & Wiens, J. J. (2020). Recent responses to climate change reveal the drivers of species extinction and survival. *Proceedings of the National Academy of Sciences of the United States of America*, 117(8), 4211–4217. <https://doi.org/10.1073/pnas.1913007117>
- Ruel, J. J., & Ayres, M. P. (1999). Jensen's inequality predicts effects of environmental variation. *Trends in Ecology and Evolution*, 14(9), 361–366.
- Schreiber, S. J., Yamamichi, M., & Strauss, S. Y. (2019). When rarity has costs: coexistence under positive frequency-dependence and environmental stochasticity. *Ecology*, 100(7), e02664. <https://doi.org/10.1002/ecs2.2664>
- Usinowicz, J., Chang-Yang, C.-H., Chen, Y.-Y., Clark, J. S., Fletcher, C., Garwood, N. C., ... Wright, S. J. (2017). Temporal coexistence mechanisms contribute to the latitudinal gradient in forest diversity. *Nature*, 550(7674), 105–108. <https://doi.org/10.1038/nature24038>
- Sexton, J. P., McIntyre, P. J., Angert, A. L., & Rice, K. J. (2009). Evolution and ecology of species range limits. *Annual Review of Ecology, Evolution, and Systematics*, 40, 415–436. <https://doi.org/10.1146/annurev.ecolsys.110308.120317>
- Shea, K., & Chesson, P. (2002). Community ecology theory as a framework for biological invasions. *Trends in Ecology & Evolution*, 17(4), 170–176. [https://doi.org/10.1016/S0169-5347\(02\)02495-3](https://doi.org/10.1016/S0169-5347(02)02495-3)
- Shoemaker, L. G., Barner, A. K., Bittleston, L. S., & Teufel, A. I. (2020). Quantifying the relative importance of variation in predation and the environment for species coexistence. *Ecology Letters*, 23(6), 939–950. <https://doi.org/10.1111/ele.13482>
- Shoemaker, L. G., Sullivan, L. L., Donohue, I., Cabral, J. S., Williams, R. J., Mayfield, M. M., ... Abbott, K. C. (2020). Integrating the underlying structure of stochasticity into community ecology. *Ecology*, 101(2), e02652. <https://doi.org/10.1002/ecs2.2922>
- Sirén, A. P. K., & Morelli, T. L. (2020). Interactive range-limit theory (iRLT): An extension for predicting range shifts. *Journal of Animal Ecology*, 89(4), 940–954. <https://doi.org/10.1111/1365-2656.13150>

- Smale, D. A., & Wernberg, T. (2013). Extreme climatic event drives range contraction of a habitat-forming species. *Proceedings of the Royal Society B: Biological Sciences*, *280*(1754), 20122829. <https://doi.org/10.1098/rspb.2012.2829>
- Smith, M. D. (2011). An ecological perspective on extreme climatic events: A synthetic definition and framework to guide future research. *Journal of Ecology*, *99*(3), 656–663. <https://doi.org/10.1111/j.1365-2745.2011.01798.x>
- Snyder, R. E. (2008). When does environmental variation most influence species coexistence? *Theoretical Ecology*, *1*, 129–139. <https://doi.org/10.1007/s12080-008-0015-3>
- Song, C., Barabás, G., & Saavedra, S. (2019). On the Consequences of the Interdependence of Stabilizing and Equalizing Mechanisms. *The American Naturalist*, *194*(5), 627–639. <https://doi.org/10.1086/705347>
- Soroye, P., Newbold, T., & Kerr, J. (2020). Climate change contributes to widespread declines among bumble bees across continents. *Science*, *367*(6478), 685–688. <https://doi.org/10.1126/science.aax8591>
- Svenning, J. C., Gravel, D., Holt, R. D., Schurr, F. M., Thuiller, W., Münkemüller, T., ... Normand, S. (2014). The influence of interspecific interactions on species range expansion rates. *Ecography*, *37*(12), 1198–1209. <https://doi.org/10.1111/j.1600-0587.2013.00574.x>
- Swain, D. L., Langenbrunner, B., Neelin, J. D., & Hall, A. (2018). Increasing precipitation volatility in twenty-first-century California. *Nature Climate Change*, *8*(5), 427–433. <https://doi.org/10.1038/s41558-018-0140-y>
- Taylor, C. M., & Hastings, A. (2005). Allee effects in biological invasions. *Ecology Letters*, *8*(8), 895–908. <https://doi.org/10.1111/j.1461-0248.2005.00787.x>
- Terry, J. C. D., Chen, J., & Lewis, O. T. (2021). Natural enemies have inconsistent impacts on the coexistence of competing species. *BioRxiv*. <https://doi.org/10.1101/2020.08.27.270389>
- Thompson, P. L., & Fronhofer, E. A. (2019). The conflict between adaptation and dispersal for maintaining biodiversity in changing environments. *Proceedings of the National Academy of Sciences of the United States of America*, *116*(42), 21061–21067. <https://doi.org/10.1073/pnas.1911796116>
- Thompson, P. L., & Gonzalez, A. (2017). Dispersal governs the reorganization of ecological networks under environmental change. *Nature Ecology & Evolution*, *1*(6), 0162. <https://doi.org/10.1038/s41559-017-0162-0>
- Thompson, P. L., Guzman, L. M., De Meester, L., Horváth, Z., Ptačnik, R., Vanschoenwinkel, B., ... Chase, J. M. (2020). A process-based metacommunity framework linking local and regional scale community ecology. *Ecology Letters*, *23*(9), 1314–1329. <https://doi.org/10.1111/ele.13568>
- Thompson, R. M., Beardall, J., Beringer, J., Grace, M., & Sardina, P. (2013). Means and extremes: Building variability into community-level climate change experiments. *Ecology Letters*, *16*(6), 799–806. <https://doi.org/10.1111/ele.12095>
- Tingley, M. W., Koo, M. S., Moritz, C., Rush, A. C., & Beissinger, S. R. (2012). The push and pull of climate change causes heterogeneous shifts in avian elevational ranges. *Global Change Biology*, *18*(11), 3279–3290. <https://doi.org/10.1111/j.1365-2486.2012.02784.x>
- Tucker, C. M., & Cadotte, M. W. (2013). Fire variability, as well as frequency, can explain coexistence between seeder and resprouter life histories. *Journal of Applied Ecology*, *50*(3), 594–602. <https://doi.org/10.1111/1365-2664.12073>
- Tucker, C. M., & Fukami, T. (2014). Environmental variability counteracts priority effects to facilitate species coexistence: evidence from nectar microbes. *Proceedings of the Royal Society B: Biological Sciences*, *281*(1778), 20132637. <https://doi.org/10.1098/rspb.2013.2637>
- Turner, M. G., Calder, W. J., Cumming, G. S., Hughes, T. P., Jentsch, A., LaDeau, S. L., ... Carpenter, S. R. (2020). Climate change, ecosystems and abrupt change: science priorities. *Philosophical Transactions of the Royal Society B: Biological Sciences*, *375*(1794), 20190105. <https://doi.org/10.1098/rstb.2019.0105>
- Twine, S., Audzijonyte, A., Blanchard, J. L., Champion, C., de la Chesnais, T., Fitzgibbon, Q. P., ... Pecl, G. T. (2020). A cross-scale framework to support a mechanistic understanding and modelling of marine climate-driven species redistribution, from individuals to communities. *Ecography*, 1–15. <https://doi.org/10.1111/ecog.04996>
- Tylianakis, J. M., & Morris, R. J. (2017). Ecological Networks Across Environmental Gradients. *Annual Review of Ecology, Evolution, and Systematics*, *48*(1), 25–48. <https://doi.org/10.1146/annurev-ecolsys-110316-022821>
- Urban, M. C., Bocedi, G., Hendry, A. P., Mihoub, J. B., Peer, G., Singer, A., ... Travis, J. M. J. (2016). Improving the forecast for biodiversity under climate change. *Science*, *353*(6304), aad8466. <https://doi.org/10.1126/science.aad8466>

- Urban, M. C., & De Meester, L. (2009). Community monopolization: Local adaptation enhances priority effects in an evolving metacommunity. *Proceedings of the Royal Society B: Biological Sciences*, 276(1676), 4129–4138. <https://doi.org/10.1098/rspb.2009.1382>
- Urban, M. C., Tewksbury, J. J., & Sheldon, K. S. (2012). On a collision course: Competition and dispersal differences create no-analogue communities and cause extinctions during climate change. *Proceedings of the Royal Society B: Biological Sciences*, 279(1735), 2072–2080. <https://doi.org/10.1098/rspb.2011.2367>
- Urban, M. C., Zarnetske, P. L., & Skelly, D. K. (2013). Moving forward: dispersal and species interactions determine biotic responses to climate change. *Annals of the New York Academy of Sciences*, 1297, 44–60. <https://doi.org/10.1111/nyas.12184>
- Uricchio, L. H., Daws, S. C., Spear, E. R., & Mordecai, E. A. (2019). Priority effects and nonhierarchical competition shape species composition in a complex grassland community. *American Naturalist*, 193(2), 213–226. <https://doi.org/10.1086/701434>
- Usinowicz, J., & Levine, J. M. (2018). Species persistence under climate change: a geographical scale coexistence problem. *Ecology Letters*, 21(11), 1589–1603. <https://doi.org/10.1111/ele.13108>
- Usinowicz, J., & Levine, J. M. (2021). Climate-driven range shifts reduce persistence of competitors in a perennial plant community. *Global Change Biology*, (November 2020), gcb.15517. <https://doi.org/10.1111/gcb.15517>
- Vasseur, D. A., DeLong, J. P., Gilbert, B., Greig, H. S., Harley, C. D. G., McCann, K. S., ... O'Connor, M. I. (2014). Increased temperature variation poses a greater risk to species than climate warming. *Proceedings of the Royal Society B: Biological Sciences*, 281(1779), 20132612. <https://doi.org/10.1098/rspb.2013.2612>
- Vasseur, D. A., & Fox, J. W. (2009). Phase-locking and environmental fluctuations generate synchrony in a predator–prey community. *Nature*, 460(7258), 1007–1010. <https://doi.org/10.1038/nature08208>
- Vázquez, D. P., Gianoli, E., Morris, W. F., & Bozinovic, F. (2017). Ecological and evolutionary impacts of changing climatic variability. *Biological Reviews*, 92(1), 22–42. <https://doi.org/10.1111/brv.12216>
- Vilà-Cabrera, A., Premoli, A. C., & Jump, A. S. (2019). Refining predictions of population decline at species' rear edges. *Global Change Biology*, 25(5), 1549–1560. <https://doi.org/10.1111/gcb.14597>
- Wallingford, P. D., Morelli, T. L., Allen, J. M., Beaury, E. M., Blumenthal, D. M., Bradley, B. A., ... Sorte, C. J. B. (2020). Adjusting the lens of invasion biology to focus on the impacts of climate-driven range shifts. *Nature Climate Change*, 10(5), 398–405. <https://doi.org/10.1038/s41558-020-0768-2>
- Wernberg, T., Smale, D. A., Tuya, F., Thomsen, M. S., Langlois, T. J., De Bettignies, T., ... Rousseaux, C. S. (2013). An extreme climatic event alters marine ecosystem structure in a global biodiversity hotspot. *Nature Climate Change*, 3(1), 78–82. <https://doi.org/10.1038/nclimate1627>
- Williams, C. K., Ives, A. R., & Applegate, R. D. (2003). Population dynamics across geographical ranges: Time-series analyses of three small game species. *Ecology*, 84(10), 2654–2667. <https://doi.org/10.1890/03-0038>
- Yackulic, C. B. (2017). Competitive exclusion over broad spatial extents is a slow process: evidence and implications for species distribution modeling. *Ecography*, 40(2), 305–313. <https://doi.org/10.1111/ecog.02836>
- Zander, A., Bersier, L. F., & Gray, S. M. (2017). Effects of temperature variability on community structure in a natural microbial food web. *Global Change Biology*, 23(1), 56–67. <https://doi.org/10.1111/gcb.13374>
- Zepeda, V., & Martorell, C. (2019). Fluctuation-independent niche differentiation and relative non-linearity drive coexistence in a species-rich grassland. *Ecology*, 100(8), 1–10. <https://doi.org/10.1002/ecy.2726>
- Chesson, P., & Warner, R. (1981). Environmental variability promotes coexistence in lottery competitive systems. *American Naturalist*, 117, 923–943.
- Armstrong, R. A., & McGehee, R. (1980). Competitive Exclusion. *The American Naturalist*, 115(2), 151–170.
- O'Sullivan, J. D., Knell, R. J., & Rosenberg, A. G. (2019). Metacommunity-scale biodiversity regulation and the self-organised emergence of macroecological patterns. *Ecology Letters*, 22(9), 1428–1438. <https://doi.org/10.1111/ele.13294>
- Oldfather, M. F., Kling, M. M., Sheth, S. N., Emery, N. C., & Ackerly, D. D. (2020). Range edges in heterogeneous landscapes: Integrating geographic scale and climate complexity into range dynamics. *Global Change Biology*, 26(3), 1055–1067. <https://doi.org/10.1111/gcb.14897>
- Alexander, J. M., Chalmandrier, L., Lenoir, J., Burgess, T. I., Essl, F., Haider, S., ... Pellissier, L. (2018). Lags in the response of mountain plant communities to climate change. *Global Change Biology*, 24(2), 563–579. <https://doi.org/10.1111/gcb.13976>
- Ellner, S. P., Snyder, R. E., Adler, P. B., & Hooker, G. (2019). An expanded modern coexistence theory for empirical applications. *Ecology Letters*, 22(1), 3–18. <https://doi.org/10.1111/ele.13159>
